# Supplementary material for: Microwave-assisted rapid synthesis of luminescent gold nanoclusters for sensing Hg2+ in living cells using fluorescence imaging
Source: Royal Society of Chemistry journal article supplement (doi:10.1039/c2nr30219e), 2012-01-01
Supplement: c2nr30219e.pdf [file c2nr30219e.pdf]

## Electronic Supplementary Information

### Microwave-assisted rapid synthesis of luminescent gold nanoclusters for sensing $\text{Hg}^{2+}$ in living cells using fluorescence imaging

Li Shang,<sup>a</sup> Linxiao Yang,<sup>a</sup> Florian Stockmar,<sup>a</sup> Radian Popescu,<sup>b</sup> Vanessa Trouillet,<sup>c</sup> Michael Bruns,<sup>c</sup> Dagmar Gerthsen<sup>d</sup> and G. Ulrich Nienhaus<sup>a,d,\*</sup>

<sup>a</sup> Institute of Applied Physics and Center for Functional Nanostructures (CFN), Karlsruhe Institute of Technology (KIT), Wolfgang-Gaede-Strasse 1, 76131 Karlsruhe, Germany.

<sup>b</sup> Laboratory of Electron Microscopy (LEM), Karlsruhe Institute of Technology (KIT), Wolfgang-Gaede-Strasse 1, 76131 Karlsruhe, Germany.

<sup>c</sup> Institute of Materials Research III, Karlsruhe Institute of Technology (KIT), Hermann-von-Helmholtz-Platz 1, 76344 Karlsruhe, Germany.

<sup>d</sup> Department of Physics, University of Illinois at Urbana-Champaign, Urbana, Illinois 61801, USA.

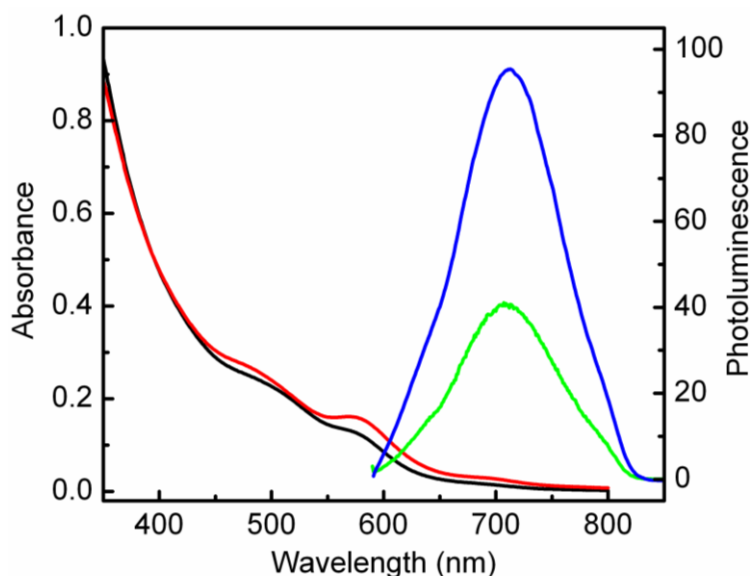

**Fig. S1** Absorption spectra of AuNCs synthesized by normal heating in an oven at 70 °C for 3 h (HT\_AuNCs, black curve) and microwave irradiation at 180 W for 4 min (MW\_AuNCs, red curve). Fluorescence emission spectra of HT\_AuNCs (green curve) and MW\_AuNCs (blue curve) were measured with excitation at 580 nm.

\* Address correspondence to [uli.nienhaus@kit.edu](mailto:uli.nienhaus@kit.edu).

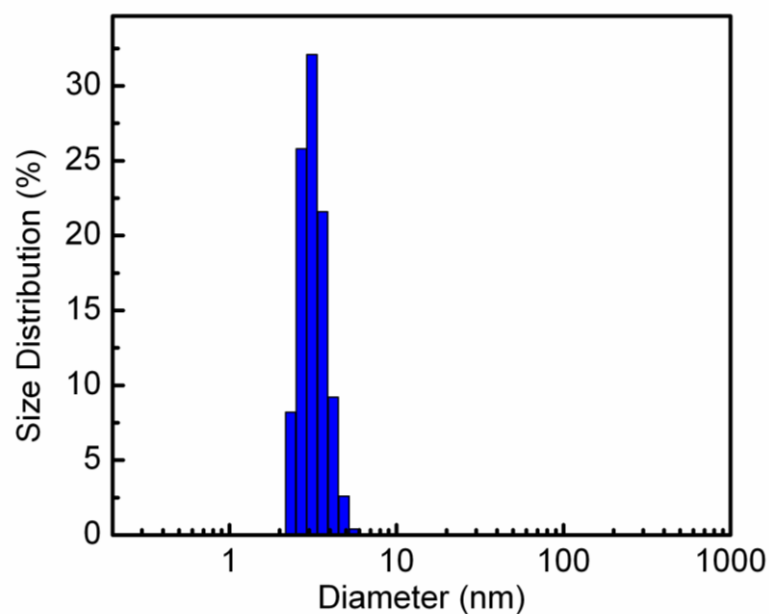

**Fig. S2** Size distribution of an aqueous solution of DHLA-AuNCs as determined by DLS.

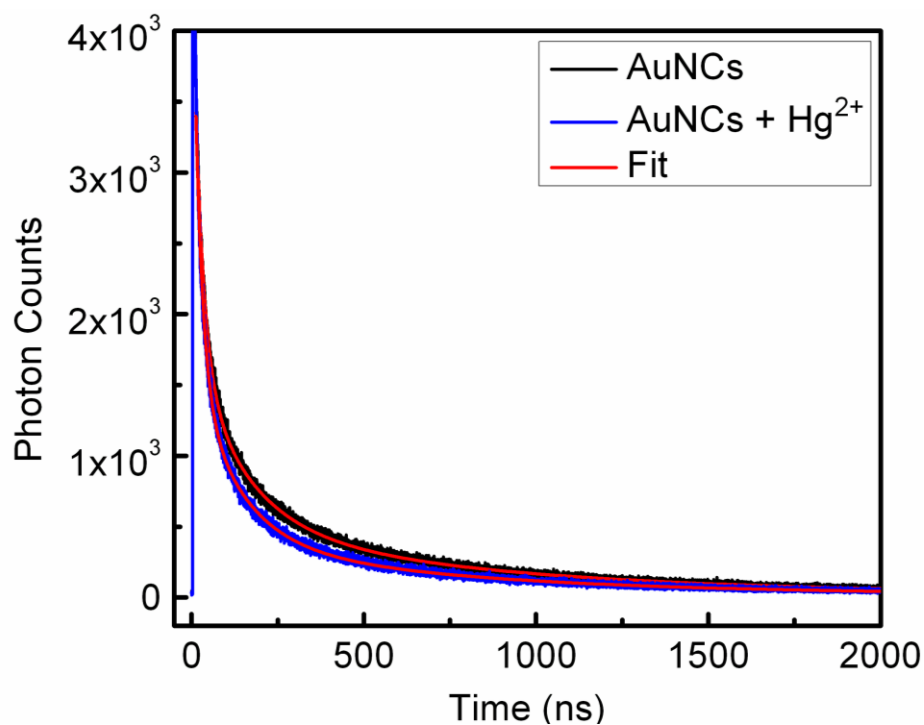

**Fig. S3** Fluorescence decay curves of DHLA-AuNC solutions (10  $\mu\text{g/ml}$ , PBS) in the absence (black) and presence of  $\text{Hg}^{2+}$  (10  $\mu\text{M}$ , blue), and the corresponding fit curves (red) obtained by nonlinear least-squares fits with multi-exponential decay functions.

**Table S1** Parameters of multi-exponential fits to the observed luminescence decay of DHLA-AuNCs in the absence and presence of Hg<sup>2+</sup>.

|                          | $\tau_1$ (ns) | $\alpha_1$ (%) | $\tau_2$ (ns) | $\alpha_2$ (%) | $\tau_3$ (ns) | $\alpha_3$ (%) | $\tau_{av}$ (ns) |
|--------------------------|---------------|----------------|---------------|----------------|---------------|----------------|------------------|
| AuNCs                    | 25±1          | 51.8±0.4       | 148±4         | 32.7±0.1       | 752±5         | 15.4±0.1       | 533±3            |
| AuNCs + Hg <sup>2+</sup> | 22±1          | 55.9±0.5       | 130±10        | 32.3±0.2       | 701±12        | 11.8±0.1       | 464±7            |
